# Supplementary material
Source: PubMed Central journal article supplement (PMC7045591)
Supplement: ao9b03696_si_001.pdf [file ao9b03696_si_001.pdf]

# Tuning Crystal Structures of Iron-Based Metal-Organic Frameworks for Drug Delivery Applications

Hao Pham,<sup>1</sup> Kimberly Ramos,<sup>2</sup> Andy Sua,<sup>3</sup> Jessica Acuna,<sup>3</sup> Katarzyna Slowinska,<sup>3</sup>  
Travis Nguyen,<sup>3</sup> Angela Bui,<sup>3</sup> Mark D. R. Weber<sup>3</sup> and Fangyuan Tian<sup>3\*</sup>

*1. Department of Physical Sciences, Long Beach City College, Long Beach, CA  
90808*

*2. Chemistry Department, Cerritos College, Norwalk, CA 90650*

*3. Department of Chemistry and Biochemistry, California State University Long  
Beach, Long Beach, CA 90840*

## **Supporting Information**

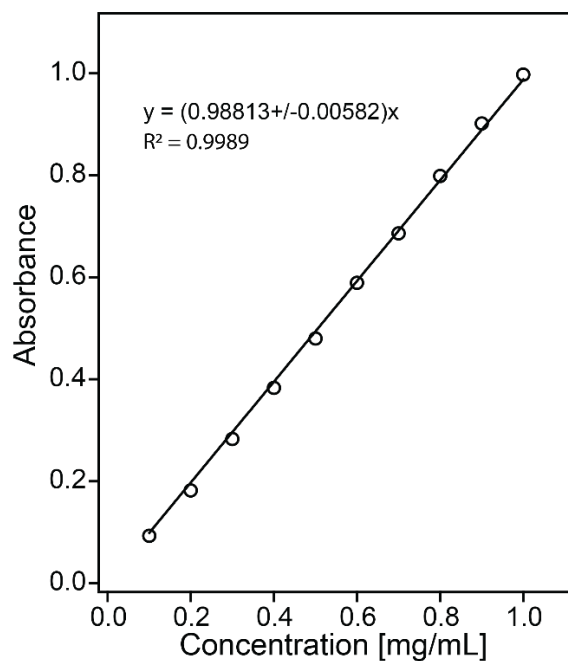

**Figure S1.** Absorbance of ibuprofen at 264 nm corresponding to increasing concentrations in hexane. Data were collected using a Shimadzu UV-Vis photospectrometer. The standard curve was used to evaluate ibuprofen concentration changes after being adsorbed by MIL materials.

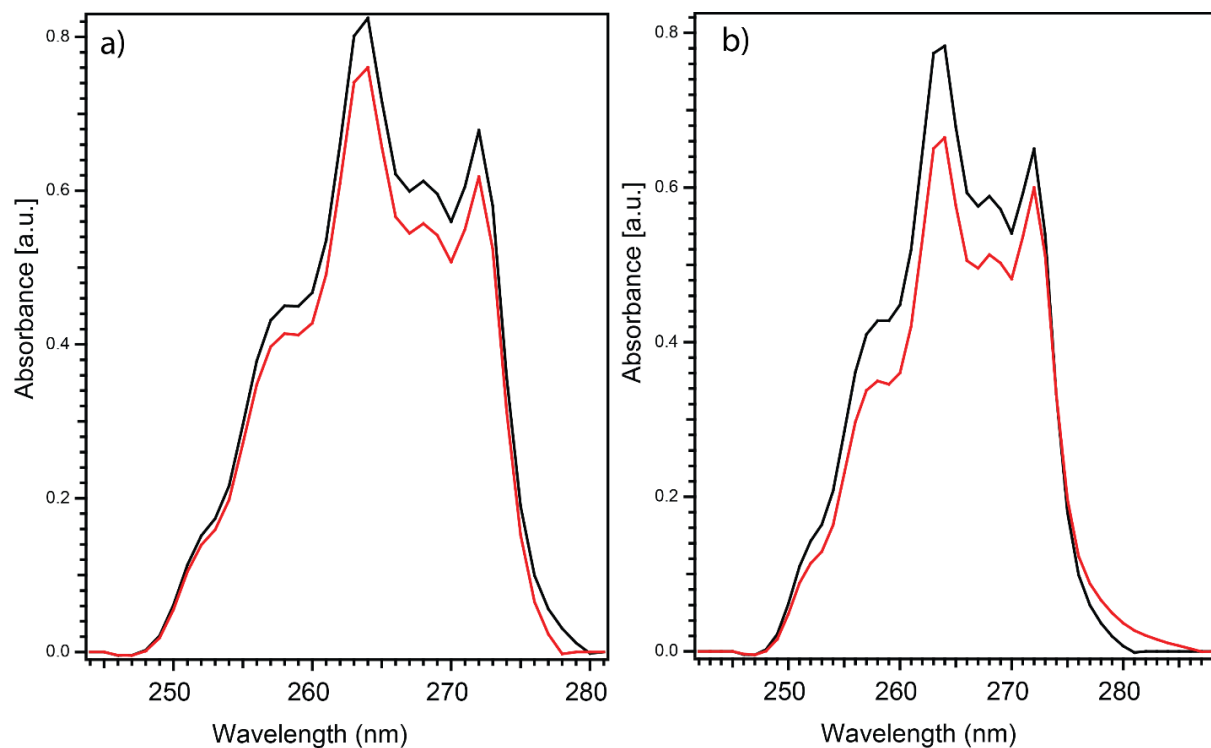

**Figure S2.** Absorbance of ibuprofen in hexane before (black) and after (red) being adsorbed by MIL-88B (a) and MIL-53 (b) materials. The ibuprofen solution was diluted before measurements.

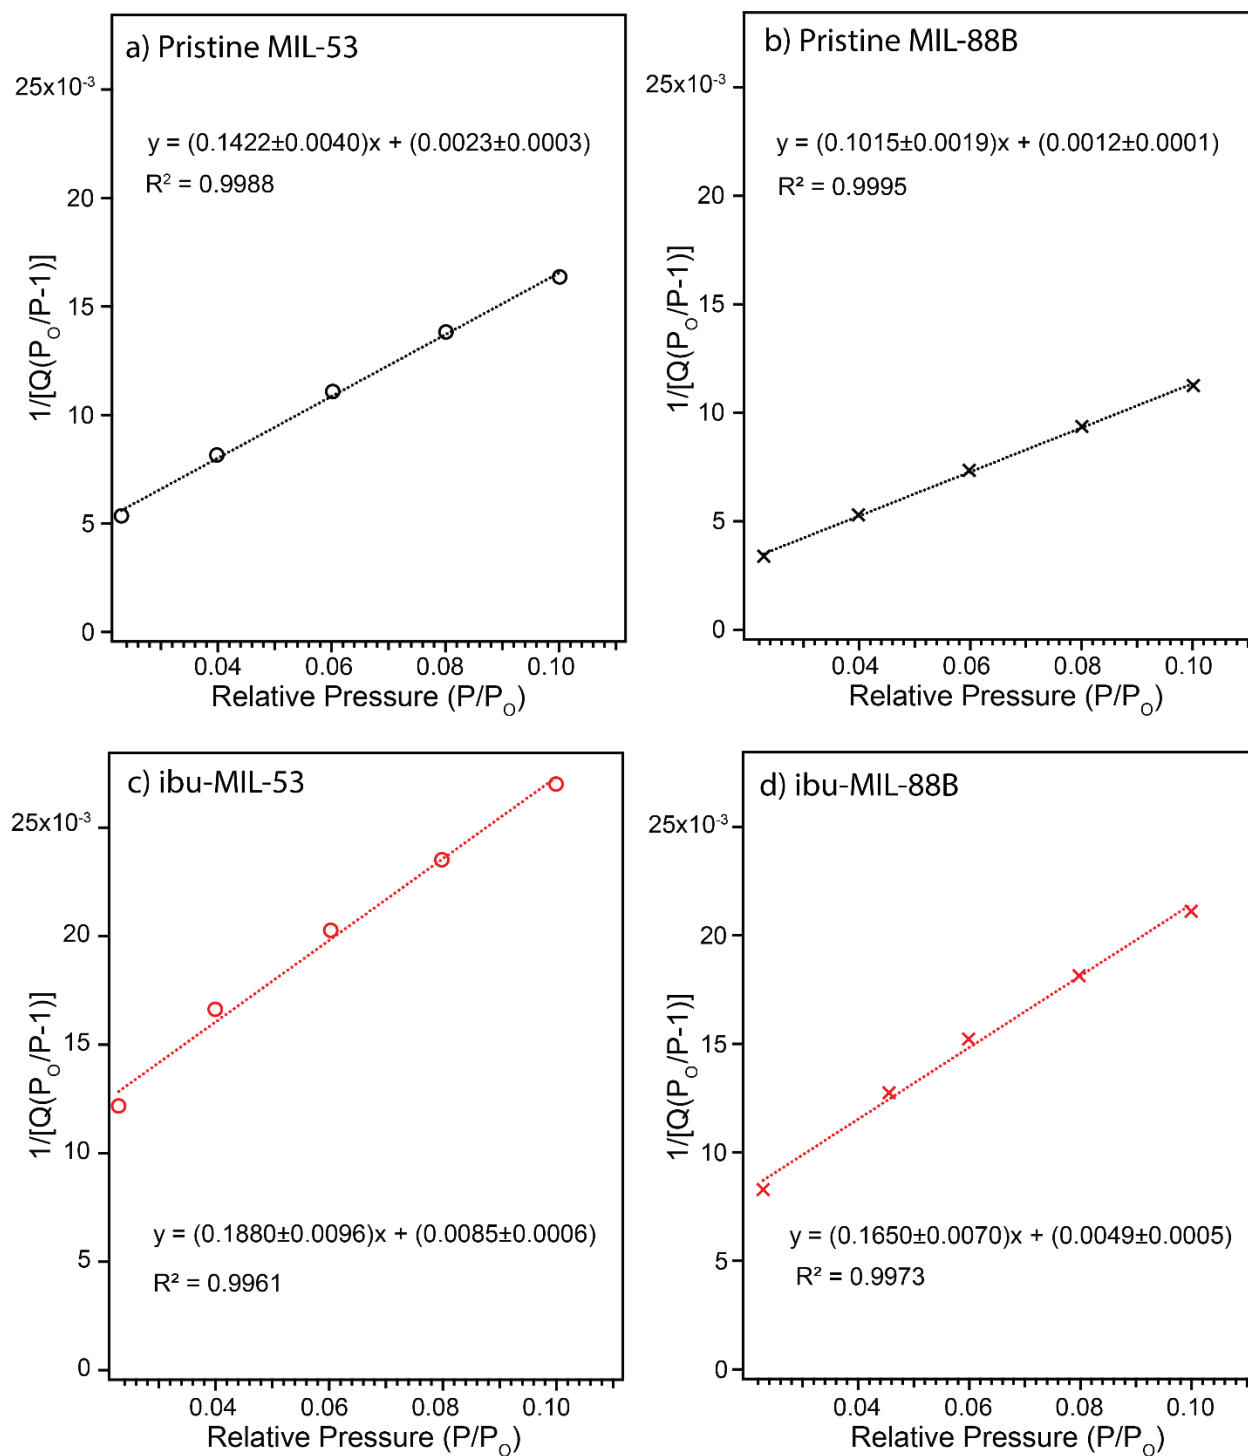

**Figure S3.** BET plots of a) MIL-53 (circle) and b) MIL-88B (cross) before (black) and after (red) ibuprofen loading based on nitrogen adsorption isotherms at 77 K.

**Table S1.** Summary of BET parameters and SSA of MIL-53 and MIL-88B with and without ibuprofen

| Sample      | C     | $V_m$ ( $cm^3/g$ , STP) | SSA ( $m^2/g$ ) |
|-------------|-------|-------------------------|-----------------|
| MIL-53      | 62.26 | 6.92                    | 30.11±0.83      |
| ibu-MIL-53  | 23.06 | 5.09                    | 22.15±1.09      |
| MIL-88B     | 86.66 | 9.74                    | 42.39±0.77      |
| ibu-MIL-88B | 34.46 | 5.88                    | 25.61±1.06      |

Note:

1. C is the BET constant, describing the difference in heat of adsorption between the multilayer and the first layer formation.
2. Based on the BET equation,  $C = 1 + \text{slope}/\text{y-intercept}$ ;  $V_m = 1/(\text{slope} + \text{y-intercept})$ . Both slope and y-intercept were determined by BET plots shown in Fig. R1.
3. SSA was calculated based on Eq. S1.

$$SSA = \frac{V_m N_A}{V_g} A_0 \quad \text{Eq. S1}$$

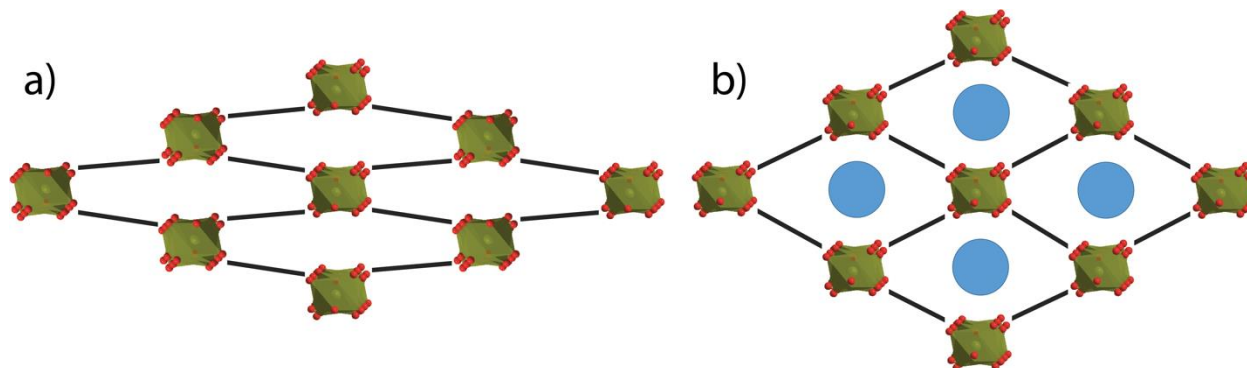

**Scheme S1.** Illustrative scheme of MIL-53 (Fe) with a) closed channels and b) expanded framework with guest molecules.

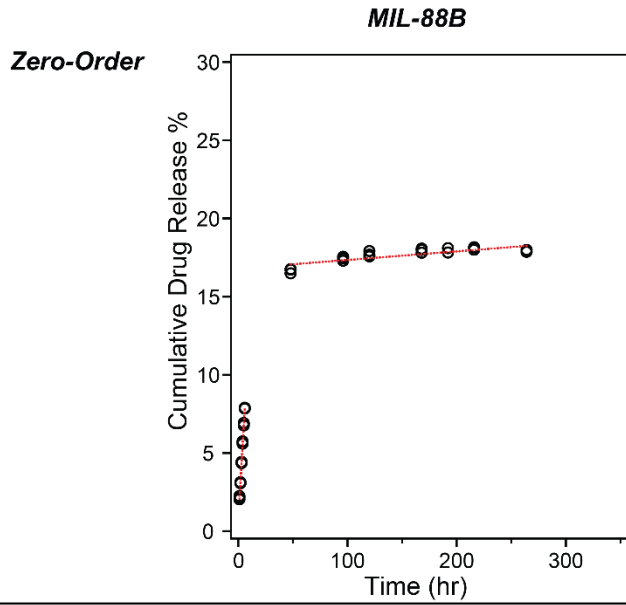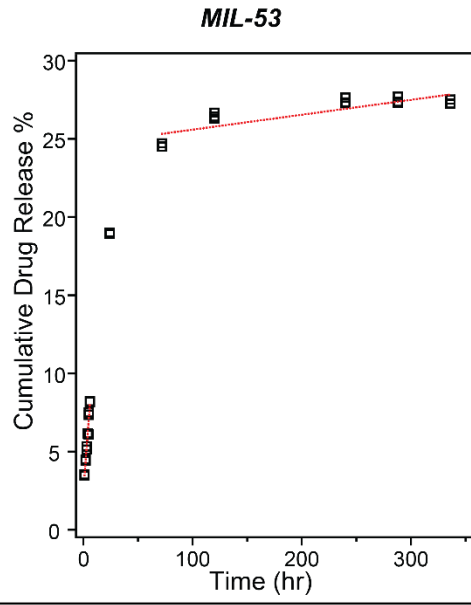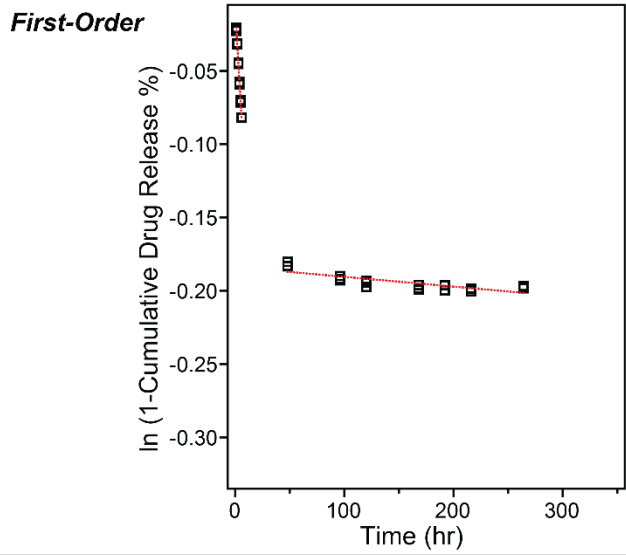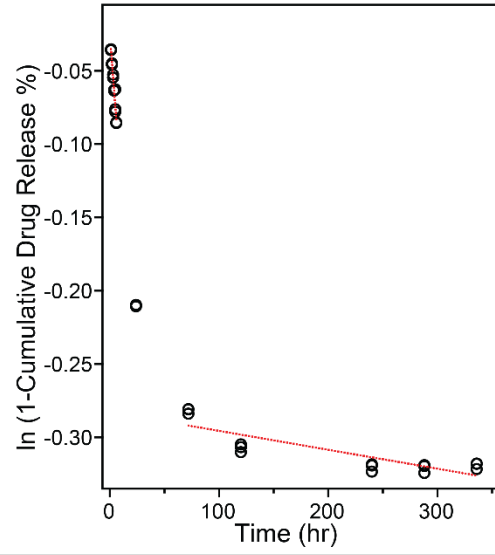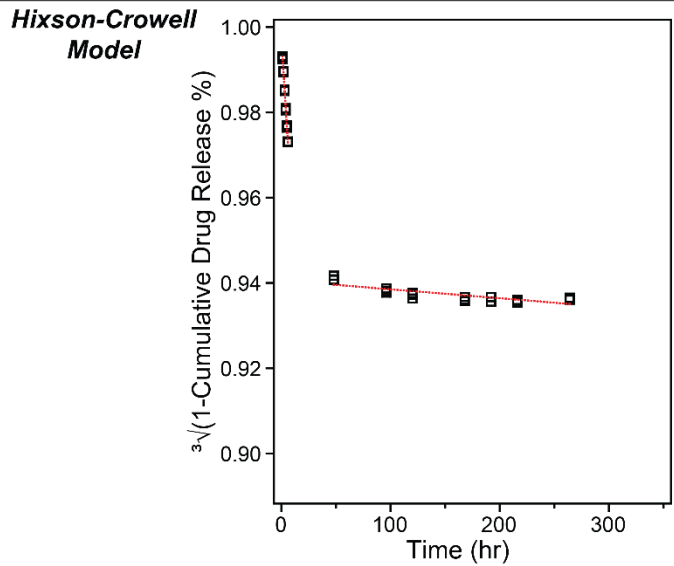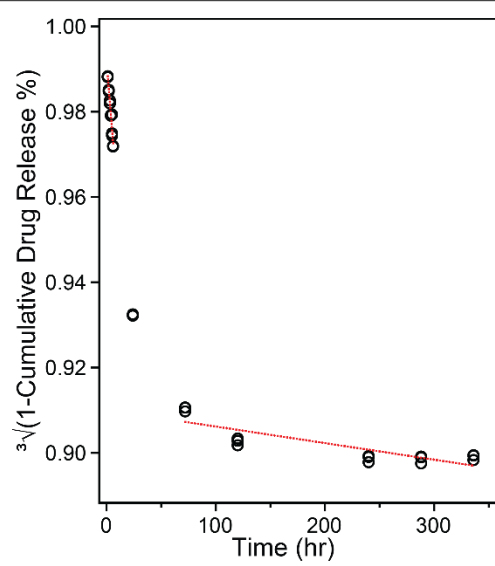

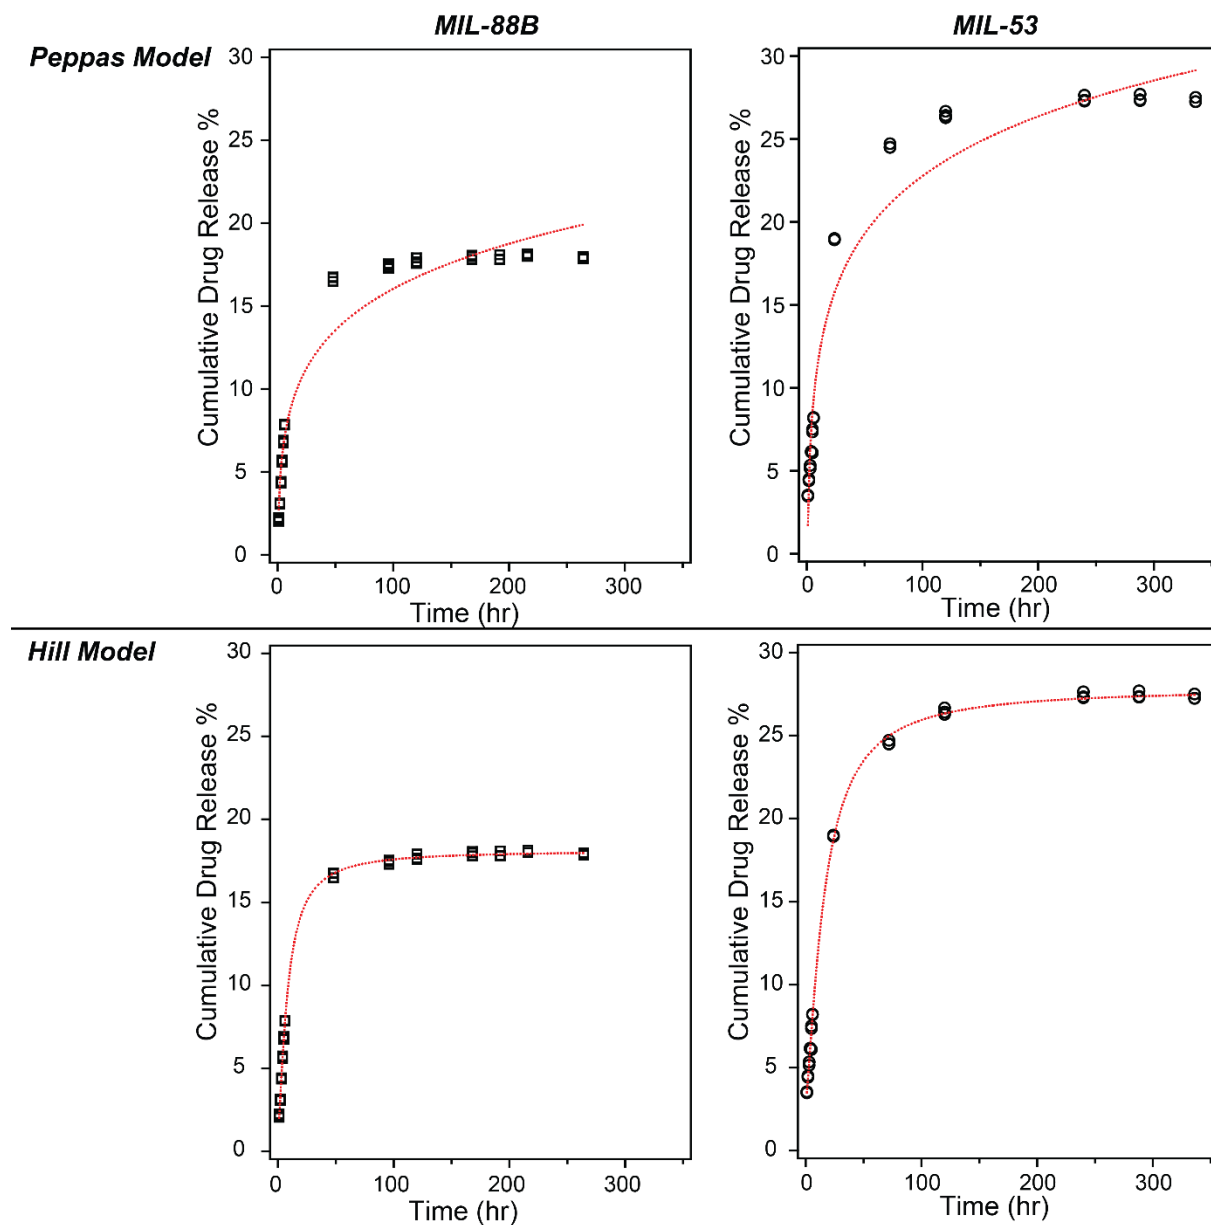

**Figure S4.** Drug release profiles of ibuprofen as a function of soaking time in PBS for MIL-88B and MIL-53. The data were fitted to different math models based on Eq. 2 to 6. Fitting parameters and correlation coefficients are listed in Table S2.

**Table S2. Summary of drug elution models and their fitting correlation coefficients.**

| Model                 |         | MIL-88B                                                                              | R <sup>2</sup> | MIL-53                                                                               | R <sup>2</sup> |
|-----------------------|---------|--------------------------------------------------------------------------------------|----------------|--------------------------------------------------------------------------------------|----------------|
| <b>Zero-Order</b>     | Stage 1 | $y = 1.1738x + 0.8909$                                                               | 0.9973         | $y = 0.9909x + 2.5701$                                                               | 0.9684         |
|                       | Stage 2 | $y = 0.0055x + 16.791$                                                               | 0.6651         | $y = 0.0095x + 24.633$                                                               | 0.7354         |
| <b>First-Order</b>    | Stage 1 | $y = -0.0124x - 0.0083$                                                              | 0.9974         | $y = -0.0097x - 0.0256$                                                              | 0.9672         |
|                       | Stage 2 | $y = -7E - 05x - 0.1838$                                                             | 0.6657         | $y = -0.0001x - 0.2827$                                                              | 0.7376         |
| <b>Hixson-Crowell</b> | Stage 1 | $y = -0.004x + 0.9972$                                                               | 0.9974         | $y = -0.0032 + 0.9915$                                                               | 0.9676         |
|                       | Stage 2 | $y = -2E - 05x + 0.9406$                                                             | 0.6655         | $y = -4E - 05x + 0.9101$                                                             | 0.7369         |
| <b>Peppas</b>         |         | $y = 3.0456x^{0.3576}$                                                               | 0.9243         | $y = 3.8365x^{0.3768}$                                                               | 0.9498         |
| <b>Hill</b>           |         | $y = 1.1443 + 16.9707 / \left[ 1 + \left( \frac{8.2915}{x} \right)^{1.3811} \right]$ | 0.9994         | $y = 2.9373 + 24.9117 / \left[ 1 + \left( \frac{16.022}{x} \right)^{1.3599} \right]$ | 0.9989         |
